## The –202 A Allele of Insulin-Like Growth Factor Binding Protein-3 (*IGFBP3*) Promoter Polymorphism Is Associated with Higher IGFBP-3 Serum Levels and Better Growth Response to Growth Hormone Treatment in Patients with Severe Growth Hormone Deficiency

Everlayny Fiorot Costalonga, Sonir R. Antonini, Gil Guerra-Junior, Berenice Bilharinho Mendonca, Ivo J. P. Arnhold, and Alexander A. L. Jorge

Unidade de Endocrinologia do Desenvolvimento (E.F.C., B.B.M., I.J.P.A., A.A.L.J.), Laboratorio de Hormonios e Genetica Molecular LIM/42, Faculdade de Medicina da Universidade de Sao Paulo, 05403-900 Sao Paulo, Brazil; Departamento de Pediatria (S.R.A.), Faculdade de Medicina de Ribeirao Preto, Universidade de Sao Paulo, 14049-900 Sao Paulo, Brazil; and Departamento de Pediatria (G.G.J.), Faculdade de Medicina de Campinas, 13083-100 Sao Paulo, Brazil

**Context:** Genetic factors that influence the response to recombinant human GH (rhGH) therapy remain mostly unknown. To date, only the GH receptor gene has been investigated.

**Objective:** The aim of the study was to assess the influence of a polymorphism in the IGF-binding protein-3 (*IGFBP-3*) promoter region (–202 A/C) on circulating IGFBP-3 levels and growth response to rhGH therapy in children with GH deficiency (GHD).

**Design and Patients:** –202 A/C *IGFBP3* genotyping (rs2854744) was correlated with data of 71 children with severe GHD who remained prepubertal during the first year of rhGH treatment.

**Main Outcome Measures:** We measured IGFBP-3 levels and first year growth velocity (GV) during rhGH treatment.

**Results:** Clinical and laboratory data at the start of treatment were indistinguishable among patients with different –202 A/C *IGFBP3* genotypes. Despite similar rhGH doses, patients homozygous for the A allele presented higher IGFBP-3 *SD* score levels and higher mean GV in the first year of rhGH treatment than patients with AC or CC genotypes (first year GV, AA =  $13.0 \pm 2.1$  cm/yr, AC =  $11.4 \pm 2.5$  cm/yr, and CC =  $10.8 \pm 1.9$  cm/yr;  $P = 0.016$ ). Multiple linear regression analyses demonstrated that the influence of –202 A/C *IGFBP3* genotype on IGFBP-3 levels and GV during the first year of rhGH treatment was independent of other variables.

**Conclusion:** The –202 A allele of *IGFBP3* promoter region is associated with increased IGFBP-3 levels and GV during rhGH treatment in prepubertal GHD children. (*J Clin Endocrinol Metab* 94: 588–595, 2009)

**G**H replacement is a standard therapy for children with short stature due to GH deficiency (GHD). The usual treatment is carried out with empirical and fixed doses of recombinant human GH (rhGH) adjusted uniquely for body weight or surface (1). Although it is expected that rhGH replacement completely

resolves growth impairment in children with severe GHD, these patients exhibit considerable interindividual variability regarding growth responses to rhGH.

Some of the clinical factors that influence growth response to rhGH have already been identified, such as maximum GH peak

ISSN Print 0021-972X ISSN Online 1945-7197  
Printed in U.S.A.

Copyright © 2009 by The Endocrine Society  
doi: 10.1210/jc.2008-1608 Received July 25, 2008. Accepted October 29, 2008.  
First Published Online November 4, 2008

Abbreviations: BMI, Body mass index; CLIA, chemiluminescence assay; CPHD, combined pituitary hormone deficiency; GHD, GH deficiency; IGFBP-3, IGF-binding protein-3; IGHD, isolated GHD; IFMA, immunofluorometric assay; IRMA, immunoradiometric assay; rhGH, recombinant human GH; *SDS*, *SD* score.

in provocative tests (2–5), age and height SD scores (SDS) at the beginning of treatment (2–4, 6), target height (3–5), and duration of treatment (3, 5, 6). However, these variables explain only 40 to 61% of rhGH responsiveness at the first year of therapy and 37 to 58% of variability at final height, implying that further parameters may be missing from current prediction models.

Until recently, genetic factors that influence growth response to rhGH were indirectly taken into account by including parental heights in the growth prediction models (3–5). To date, only the GH receptor gene has been investigated in rhGH pharmacogenetic studies (7–9). Despite the heterogeneity of early results, these studies introduced the important concept that common variations in GH/IGF-I axis genes may play a role in predicting response to rhGH therapy.

GH promotes growth mainly by IGF-I, which acts by endocrine and paracrine mechanisms. IGF-I transport in serum is mediated mostly by IGF-binding protein-3 (IGFBP-3) and acid labile subunit. Besides being the major carrying protein for IGF-I in the circulation, IGFBP-3 can act as a modulator of IGF-I bioactivity and has IGF-I-independent actions on growth regulation at the tissue level (10–14). Twin studies indicated that about 60% of the interindividual variability in circulating levels of IGFBP-3 is genetically determined (15). The *IGFBP3* gene is highly conserved among species and is present as a single copy on chromosome 7p14-p12. In 2001, Deal *et al.* (16) identified several single-nucleotide polymorphisms in the promoter region of *IGFBP3*. The most relevant single-nucleotide polymorphism (rs2854744) was an A to C nucleotide change located 202 bp upstream to the transcription start site, near elements believed to control basal promoter activity of *IGFBP3*. Genotype at this locus was highly correlated to circulating levels of IGFBP-3 in healthy adults. Mean IGFBP-3 levels were highest in individuals with the AA genotype and declined significantly in a stepwise manner in the presence of one or two copies of the C allele. Further studies confirmed this genotype-phenotype association (17–23). Additionally, *in vitro* studies documented significantly higher promoter activity of the A allele in comparison to the C allele (16), supporting the functional importance of –202 A/C polymorphism.

Until now, there were no data on the effect of this polymorphism on the IGFBP-3 serum levels and growth response to rhGH treatment in children with GHD. Therefore, the aim of our study was to evaluate the influence of the –202 A/C *IGFBP3* promoter polymorphism on the serum levels of IGFBP-3 and growth response to rhGH therapy in children with severe GHD.

## Subjects and Methods

### Subjects

Seventy-one severe GHD patients who were treated exclusively with rhGH on a daily schedule and who remained prepubertal throughout the first year of therapy were selected for evaluation of first year growth velocity and IGFBP-3 serum levels. Among these patients, 36 have already reached adult height after  $8 \pm 3$  yr of rhGH treatment and were also analyzed regarding final height growth outcomes. GHD diagnosis was based on clinical and auxological parameters as well as the failure of GH response on at least two provocative tests. Patients with central

nervous system tumors, meningoencephalocele, or previous radiation therapy were not included.

Magnetic resonance imaging of the hypothalamic-pituitary region was performed in all patients. According to the basal levels and hormonal response to the combined test (insulin + TRH + GnRH), patients were classified as isolated GHD (IGHD) or combined pituitary hormone deficiency (CPHD). Patients with CPHD were on regular replacement therapy for the other hormonal deficiencies.

The study protocol was approved by the Hospital Ethics Committee, and informed consent was obtained from all patients or their parents before initiating the molecular studies.

### Study protocol

rhGH was administered sc at a mean dose of  $32 \mu\text{g}/\text{kg} \cdot \text{d}$  (0.1 IU/kg · d), which was adjusted according to changes in weight at each visit. All children were evaluated at baseline and every 3–4 months during rhGH treatment. First year growth velocity was determined after an observation period of at least 11 months. Among the 36 GHD patients who completed growth, the adult height was measured, on average, 1.4 yr after rhGH withdrawal. Evaluations were performed at the same period of day and included measurements of weight (measured with a digital scale) and standing height (measured with a stadiometer). Height and body mass index (BMI) were expressed as SDS (24, 25). Target height was calculated [(father's height + mother's height + 13 cm for boys or – 13 cm for girls)/2] and expressed as SDS. Left hand and wrist x-rays for bone age determination were assessed based on the method of Greulich and Pyle (26). IGF-I and IGFBP-3 levels were measured both before and during therapy.

### Hormone assays

GH was initially measured by immunoradiometric assay (IRMA) (61% of the patients) and subsequently by immunofluorometric assay (IFMA) (AutoDELFLIA, Wallac, Turku, Finland) method with monoclonal antibodies (39% of the patients). Cutoff levels used for GHD diagnosis were peak GH levels no greater than  $5.0 \mu\text{g}/\text{liter}$  (IRMA) or no greater than  $3.3 \mu\text{g}/\text{liter}$  (IFMA).

IGF-I levels were obtained at the start of treatment and near the end of the first year of rhGH therapy in 65 and 77% of patients, respectively. IGF-I was measured by RIA after ethanol extraction (Diagnostic Systems Laboratories, Webster, TX) (91% of patients) or by chemiluminescence assays (CLIA) (IMMULITE; Diagnostic Products Corp., Los Angeles, CA) (9% of patients). IGFBP-3 levels were obtained at the start of treatment and near the end of the first year of rhGH therapy in 51 and 72% of patients, respectively. IGFBP-3 was measured by IRMA (Diagnostic Systems Laboratories, 90%) or CLIA (IMMULITE, 10%). IGF-I and IGFBP-3 levels were expressed as SDS for age and sex according to reference values provided by the respective assay kits.

### Molecular studies

Genomic DNA was isolated from peripheral blood leukocytes by standard methods from all patients. A 376-bp fragment encompassing the –202 A/C polymorphic site at the promoter region of *IGFBP3* gene was amplified using specific primers, and PCR products were digested with *FspI* enzyme (New England Biolabs, Beverly, MA). In the presence of the C allele, the 376-bp PCR fragment is digested into 260-bp and 116-bp fragments, whereas in the presence of the A allele, the restriction site is absent. Primer sequences, amplification protocols, and digestion protocols will be sent upon request.

The validity of the PCR-restriction-fragments length polymorphism analysis was verified by direct sequencing of each genotype using the BigDye FN Sequencing kit (PE Applied Biosystems, Foster City, CA). For quality control, we resequenced approximately 10% of random samples. The agreement of the genotypes determined for the blinded quality control samples was 100%.

## Statistical analysis

Qualitative variables are listed as frequencies and percentages, whereas quantitative variables are shown as mean  $\pm$  SD. Patients were compared by genotype relative to clinical and laboratory characteristics. The short-term response to rhGH was evaluated by growth velocity in the first year of treatment. The long-term response to rhGH was assessed by adult height SDS and adult height SDS minus target height SDS. IGF-I and IGFBP-3 levels were evaluated as SDS for age and sex both before and during treatment.

Genotype-group comparisons were performed according to two genetic models: a codominant model, in which the three genotypes were analyzed separately (AA vs. AC vs. CC), and a recessive model, in which patients homozygous for the A allele (AA group) were compared with patients presenting at least one copy of the C allele (AC + CC group). The recessive model was the most frequent approach adopted in previous studies, which evaluated the effects of  $-202$  A/C IGFBP3 polymorphism (16, 17, 20–22). ANOVA followed by Tukey test was used for comparisons according to the codominant model (AA vs. AC vs. CC), whereas the *t* test was used for comparisons according to the recessive model (AA vs. AC + CC). Numerical variables that did not demonstrate parametric distribution (GH peak levels and mean rhGH doses) were analyzed by Kruskal-Wallis one-way ANOVA on ranks or Mann-Whitney rank sum test. Nominal variables were compared by  $\chi^2$  or Fisher exact test, as appropriate.

To assess whether genetic variants had independent prognostic significance for outcome, we performed single followed by multiple regression analyses adjusting for the established influential factors. A *P* value  $<0.05$  was considered statistically significant. All statistical analyses were performed with SigmaStat for Windows (version 2.03; SPSS, Inc., San Rafael, CA).

## Results

### Patient's phenotype at the start of therapy

Seventy-one prepubertal GHD children (48 boys and 23 girls) were evaluated. At the start of treatment, they presented a chronological age of  $8.6 \pm 4.1$  yr, with marked bone age delay ( $4.3 \pm 2.7$  yr) and short stature (height SDS,  $-4.3 \pm 1.4$ ). Severe GHD was demonstrated by extremely low GH peak levels, obtained at

two different stimulation tests (mean GH peak,  $0.9 \pm 0.9$   $\mu\text{g/liter}$ ; range,  $<0.1$  to  $3.3$   $\mu\text{g/liter}$ ). No difference in mean GH peak was observed between patients diagnosed by IFMA or IRMA GH assays. Ninety-two percent of patients had either a defined genetic etiology for GHD (12 patients) or an anatomic abnormality of the pituitary gland on magnetic resonance imaging (ectopic posterior lobe in 45 patients and interrupted stalk in 18). Twenty-nine patients presented IGHD, and 42 had CPHD. Among the latter, central hypothyroidism was found in 77%, ACTH deficiency in 45%, and diabetes insipidus in 12%; in 53%, central hypogonadism was diagnosed during follow-up. Patients with IGHD and CPHD presented similar growth responses during rhGH treatment and, therefore, were analyzed together. Pretreatment growth velocity was not available because, due to the severity of short stature in the majority of patients, treatment was started after prompt GHD diagnosis.

### Clinical correlations with $-202$ A/C IGFBP3 genotyping

The distribution of patients among the different  $-202$  IGFBP3 genotypes was 21% AA, 54% AC, and 25% CC. The genotype frequencies conformed to the Hardy-Weinberg equilibrium test. There were no significant differences between genotype groups regarding clinical features at the start of treatment, GH peak at stimulation tests, and mean rhGH dose during treatment (Tables 1 and 2).

### IGF-I and IGFBP-3 SDS levels

Before the start of treatment, there was a tendency to lower IGFBP-3 levels adjusted for age and sex in patients presenting one or two copies of the  $-202$  C IGFBP3 allele, but this difference was not significant. During rhGH treatment, patients homozygous for the A allele presented significantly higher IGFBP-3 levels than C allele carriers in codominant ( $P = 0.002$ ) and recessive models ( $P < 0.001$ ) (Table 1 and Fig. 1). Additionally, patients homozygous for the A allele presented significant higher incre-

**TABLE 1.** Clinical and auxological characteristics of 71 children with GHD grouped according to  $-202$  A/C IGFBP3 genotype

|                                                    | $-202$ A/C IGFBP3 genotype |                |                |                | <i>P</i>           |                |
|----------------------------------------------------|----------------------------|----------------|----------------|----------------|--------------------|----------------|
|                                                    | AA                         | AC             | CC             | AC + CC        | AA vs. AC vs. CC   | AA vs. AC + CC |
| n                                                  | 15                         | 38             | 18             | 56             |                    |                |
| Gender (males:females)                             | 11:4                       | 26:12          | 11:7           | 37:19          | ns                 | ns             |
| IGHD:CPHD                                          | 14:1                       | 17:21          | 8:10           | 25:31          | ns                 | ns             |
| Target height SDS                                  | $-1.1 \pm 0.9$             | $-0.8 \pm 0.8$ | $-1.0 \pm 0.8$ | $-0.9 \pm 0.8$ | ns                 | ns             |
| Highest GH peak ( $\mu\text{g/liter}$ )            | $0.5 \pm 0.7$              | $0.9 \pm 0.8$  | $1.0 \pm 1.0$  | $1.0 \pm 0.9$  | ns                 | ns             |
| Chronological age (yr)                             | $9.6 \pm 4.8$              | $8.5 \pm 4.3$  | $8.2 \pm 3.1$  | $8.4 \pm 3.9$  | ns                 | ns             |
| Bone age delay (yr)                                | $5.2 \pm 3.1$              | $4.2 \pm 2.8$  | $3.8 \pm 2.1$  | $4.1 \pm 2.6$  | ns                 | ns             |
| Basal height SDS                                   | $-4.2 \pm 1.2$             | $-4.5 \pm 1.6$ | $-3.7 \pm 0.7$ | $-4.3 \pm 1.4$ | ns                 | ns             |
| Basal BMI SDS                                      | $-0.6 \pm 1.3$             | $-0.5 \pm 1.3$ | $0.0 \pm 1.3$  | $-0.3 \pm 1.3$ | ns                 | ns             |
| Mean rhGH dose ( $\mu\text{g/kg} \cdot \text{d}$ ) | $29 \pm 9$                 | $32 \pm 10$    | $29 \pm 9$     | $32 \pm 8$     | ns                 | ns             |
| IGFBP-3 SDS pretreatment                           | $-2.3 \pm 0.9$             | $-2.6 \pm 1.3$ | $-2.9 \pm 0.5$ | $-2.7 \pm 1.1$ | ns                 | ns             |
| IGFBP-3 SDS during treatment                       | $0.4 \pm 1.9$              | $-1.0 \pm 1.0$ | $-1.5 \pm 1.4$ | $-1.2 \pm 1.2$ | 0.002 <sup>a</sup> | $<0.001$       |
| IGF-I SDS pretreatment                             | $-1.8 \pm 1.4$             | $-2.4 \pm 1.6$ | $-2.3 \pm 1.5$ | $-2.3 \pm 1.5$ | ns                 | ns             |
| IGF-I SDS during treatment                         | $-0.5 \pm 1.6$             | $-0.1 \pm 1.9$ | $-0.8 \pm 0.9$ | $-0.3 \pm 1.7$ | ns                 | ns             |
| First year growth velocity (cm/yr)                 | $13.1 \pm 2.1$             | $11.4 \pm 2.5$ | $10.8 \pm 1.9$ | $11.2 \pm 2.3$ | 0.016 <sup>b</sup> | 0.007          |
| First year growth velocity SDS                     | $5.1 \pm 3.0$              | $3.3 \pm 2.9$  | $3.2 \pm 2.9$  | $3.2 \pm 2.9$  | ns                 | 0.037          |

ns, Not significant.

<sup>a</sup> Tukey test: AA vs. AC,  $P = 0.008$ ; AC vs. CC,  $P = 0.63$ ; AA vs. CC,  $P = 0.004$ .

<sup>b</sup> Tukey test: AA vs. AC,  $P = 0.05$ ; AC vs. CC,  $P = 0.58$ ; AA vs. CC,  $P = 0.015$ .

**TABLE 2.** Clinical and auxological characteristics of 36 children with severe GHD who reached adult height after long-term treatment with rhGH, grouped according to  $-202$  A/C *IGFBP3* genotype

|                                                    | $-202$ A/C <i>IGFBP3</i> genotype |                |                |                |
|----------------------------------------------------|-----------------------------------|----------------|----------------|----------------|
|                                                    | AA                                | AC             | CC             | AC + CC        |
| n                                                  | 9                                 | 19             | 8              | 27             |
| Gender (males:females)                             | 7:2                               | 14:5           | 5:3            | 19:8           |
| IGHD:CPHD                                          | 2:7                               | 9:10           | 3:5            | 12:15          |
| Target height SDS                                  | $-1.1 \pm 0.9$                    | $-0.9 \pm 0.7$ | $-0.9 \pm 0.8$ | $-0.9 \pm 0.7$ |
| Highest GH peak ( $\mu\text{g/liter}$ )            | $0.6 \pm 0.7$                     | $1.1 \pm 0.9$  | $1.1 \pm 1.0$  | $1.1 \pm 0.9$  |
| Chronological age (yr)                             | $10.7 \pm 4.2$                    | $10.5 \pm 3.9$ | $9.2 \pm 2.4$  | $10.1 \pm 3.5$ |
| Bone age delay (yr)                                | $5.8 \pm 3.0$                     | $5.4 \pm 3.0$  | $4.1 \pm 2.0$  | $5.0 \pm 2.9$  |
| Basal height SDS                                   | $-4.3 \pm 1.1$                    | $-5.0 \pm 1.8$ | $-3.8 \pm 1.1$ | $-4.6 \pm 1.7$ |
| Spontaneous:induced puberty                        | 3:6                               | 11:8           | 4:4            | 15:12          |
| Age at start puberty (yr)                          | $14.9 \pm 2.9$                    | $15.2 \pm 3.4$ | $14.9 \pm 3.7$ | $15.1 \pm 3.4$ |
| Treatment duration (yr)                            | $8.3 \pm 2.2$                     | $8.4 \pm 3.3$  | $9.9 \pm 3.5$  | $8.8 \pm 3.3$  |
| Mean rhGH dose ( $\mu\text{g/kg} \cdot \text{d}$ ) | $38 \pm 5$                        | $36 \pm 8$     | $32 \pm 10$    | $35 \pm 9$     |
| Final height SDS                                   | $-0.6 \pm 0.6$                    | $-1.1 \pm 1.1$ | $-1.2 \pm 1.6$ | $-1.1 \pm 1.2$ |
| Final height SDS–target height                     | $0.5 \pm 0.7$                     | $-0.1 \pm 1.1$ | $-0.4 \pm 2.2$ | $-0.2 \pm 1.5$ |

For all variables, comparison of genotypes (AA vs. AC vs. CC and AA vs. AC + CC) were not significant.

ment in *IGFBP-3* SDS levels after treatment than patients presenting at least one C allele ( $\Delta$  *IGFBP-3* SDS, AA =  $2.8 \pm 1.4$  vs. AC or CC =  $1.6 \pm 1.3$ ;  $P = 0.02$ ).

The observed relationship between *IGFBP-3* serum levels during rhGH treatment and  $-202$  A/C *IGFBP3* genotype was independent of many other clinical variables, such as age, sex, BMI, and rhGH doses, as demonstrated by multiple regression analyses. Alone, *IGFBP3* polymorphism accounted for 19% of *IGFBP-3* serum level variation ( $P < 0.001$ ) and, together with age ( $P < 0.001$ ) and gender ( $P = 0.003$ ), explained 54% of observed variation. Data analysis excluding IGF-I and *IGFBP-3* measured by CLIA (about 10% of measurements) presented similar results (data not shown). There was no relation between  $-202$  A/C *IGFBP3* genotype and IGF-I levels before the start of treatment, as well as during treatment (Table 1).

**First year growth velocity**

Mean growth velocity in the first year of rhGH treatment was higher in patients with the AA genotype and declined significantly in a stepwise manner in the presence of one or two copies of the C allele (first year growth velocity, AA =  $13.0 \pm 2.1$  cm/yr, AC =  $11.4 \pm 2.5$  cm/yr, and CC =  $10.8 \pm 1.9$  cm/yr;  $P = 0.016$ ) (Table 1 and Fig. 2). As a group, patients with at least one C allele presented a mean growth velocity 1.9 cm/yr lower than that of patients homozygous for the A allele (95% confidence interval for difference of means, 0.5 to 3.2 cm/yr;  $P = 0.007$ ). Similar results were observed when growth velocities were analyzed as SDS adjusted for sex and age (Table 1).

Additionally, single followed by multiple linear regression analyses demonstrated that the influence of this polymorphism on growth velocity was independent of other variables. Alone,

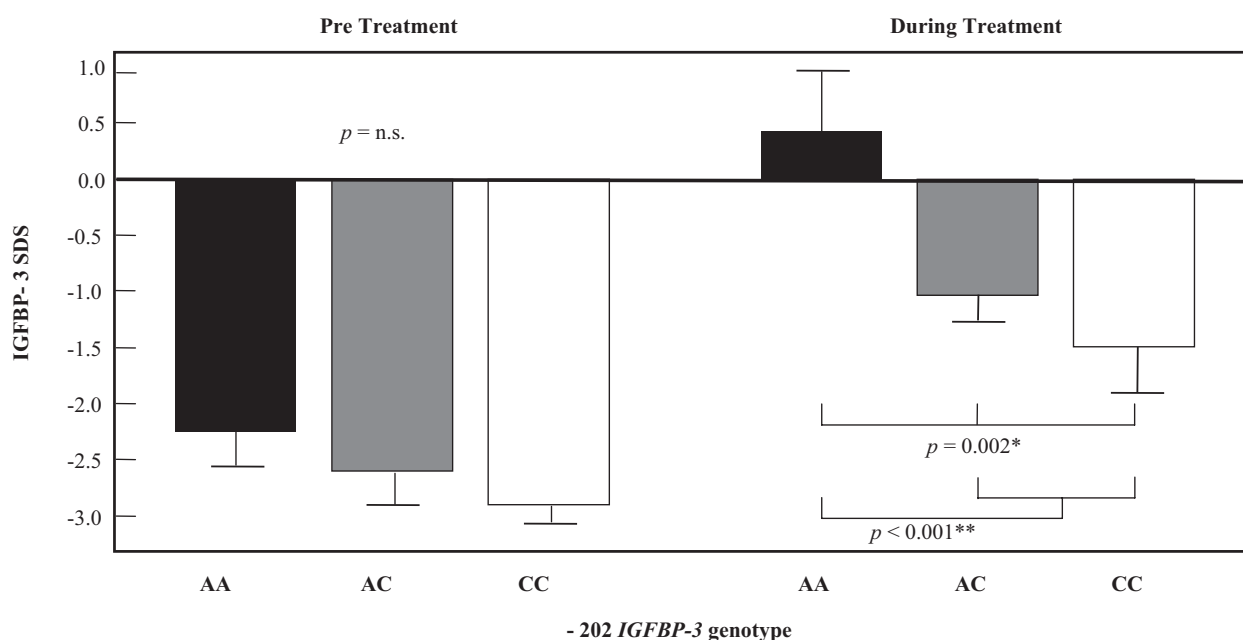

**Fig. 1.** Influence of the  $-202$  A/C *IGFBP3* genotype on *IGFBP-3* SDS levels in 71 prepubertal children with severe GHD before treatment and during rhGH treatment (mean  $\pm$  SEM). \*, AA vs. AC vs. CC; \*\*, AA vs. AC + CC.

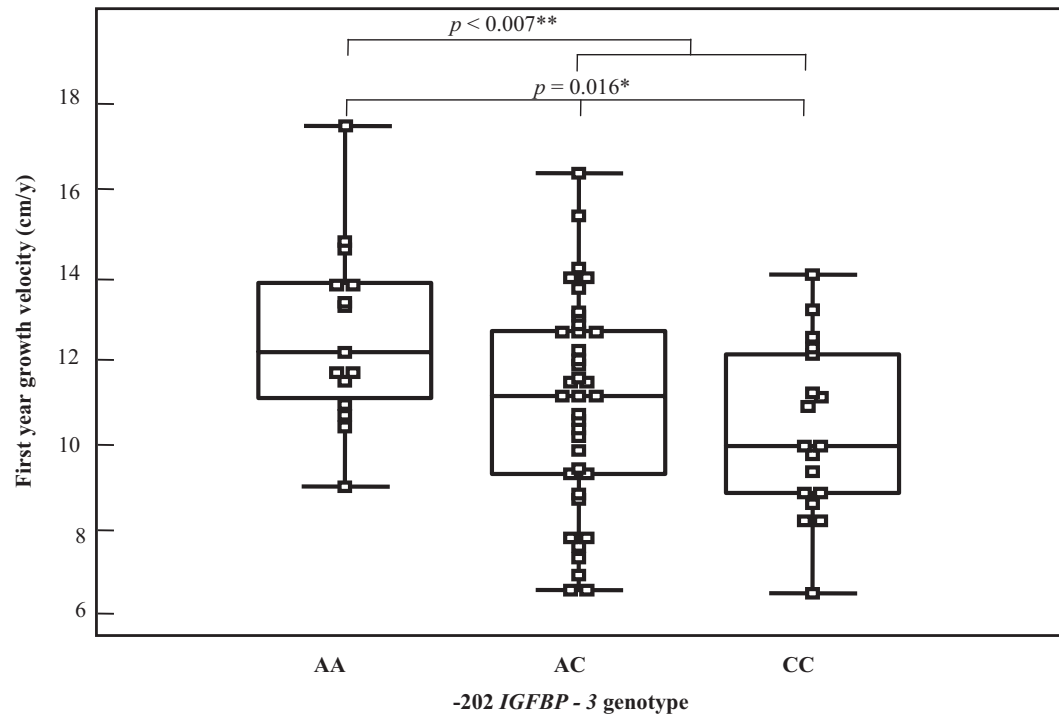

**Fig. 2.** Individual growth velocities of 71 prepubertal children with GHD during the first year of rhGH treatment, according to  $-202 A/C$  IGFBP3 genotype. \*, AA vs. AC vs. CC; \*\*, AA vs. AC + CC.

IGFBP3 polymorphism accounted for 10% of growth velocity variation ( $P = 0.004$ ) and together with height SDS ( $P < 0.001$ ) and age at the start of rhGH therapy ( $P = 0.001$ ), explained 29% of observed variation.

#### Final height SDS

Clinical and laboratory characteristics, as well as genotype distribution, of the 36 patients who reached adult height were indistinguishable from the 35 patients who were still on treatment. Genotypic groups were similar concerning gender distribution, isolated or combined GHD, spontaneous or induced puberty, age at puberty onset, parental height, highest GH peak, chronological age and bone age delay at the start of treatment, basal height SDS, BMI SDS, and mean rhGH doses (Table 2). Despite similar mean rhGH doses and treatment duration, there was a tendency for better final height growth outcomes in patients with the AA  $-202$  IGFBP3 genotype, but this difference was not significant (Table 2 and Fig. 3).

#### Discussion

Interest in a search for genetic variations that modulate rhGH sensitivity and help to explain the great variability in clinical outcomes observed in GHD children during rhGH therapy has increased in the last 5 yr. Genes involved in GH and IGF-I action are obvious candidates for rhGH pharmacogenetic studies. Considering that IGFBP-3 modulates both endocrine and local actions of IGF-I, and given the established functional importance of  $-202 A/C$  IGFBP3 promoter region polymorphism, we evaluated whether this common polymorphism could influence

growth responsiveness to rhGH therapy. Since 2001, genotype at this locus has been consistently correlated to circulating levels of IGFBP-3 in healthy adults (16). In the present study, the effects of this polymorphism on IGFBP-3 levels and growth response to rhGH treatment in children with GHD were assessed for the first time.

Regarding IGFBP-3 serum levels, studies in healthy adults demonstrated that individuals with the AA genotype present mean IGFBP-3 levels higher than patients with AC or CC genotypes (16–23). In our cohort of patients with severe GHD, this association became statistically significant only during rhGH treatment, which suggests that the effect of the  $-202 A/C$  IGFBP3 polymorphism on IGFBP-3 levels may be at least in part dependent on GH action. Theoretically, IGFBP-3 serum levels are determined not only by gene transcriptional activity, but also by posttranslational changes and stabilization in ternary complexes. Other possible influential variables such as acid labile subunit and IGF-2 levels were not evaluated in the present study. However, functional studies and the consistency of correlations between  $-202 A/C$  IGFBP3 genotype and IGFBP-3 serum levels in several studies (16–23) support a direct relationship between genotype at this locus and peptide levels.

In contrast with the clear influence of the  $-202 A/C$  genotype on IGFBP-3 serum levels, there was no correlation between this polymorphism and IGF-I serum levels, which is in accordance with other studies (20, 22) and could be explained by additional influential factors on IGF-I levels (27, 28).

Moreover, GHD children who harbor the  $-202 AA$  IGFBP3 genotype presented better mean growth velocity during the first year of rhGH treatment than patients harboring  $-202 AC$  or  $CC$  IGFBP3 genotype. The observed influence of genotype on

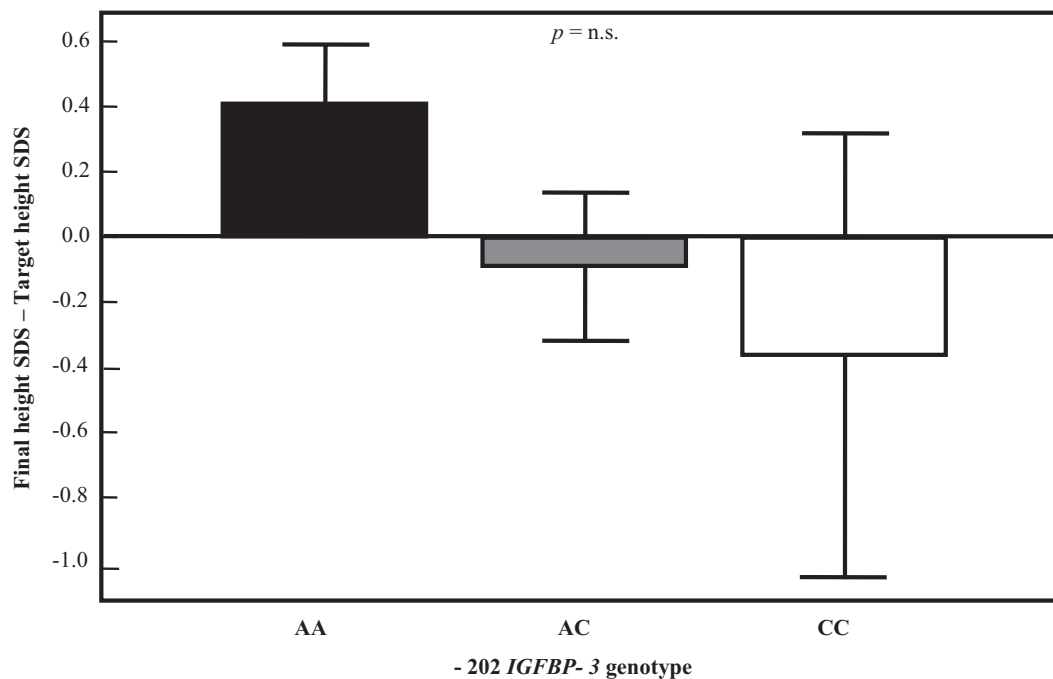

**Fig. 3.** Mean adult height SDS adjusted for target height SDS in 36 patients with severe GHD after long-term treatment with rhGH, according to  $-202$  A/C *IGFBP3* genotype (mean  $\pm$  SEM).

growth velocity was independent of other clinical variables, as demonstrated by multiple regression analyses including factors such as gender, target height SDS, age and height SDS at the start of treatment, GH peak at stimulation tests, and mean rhGH dose during treatment. Pretreatment growth velocity was not available for those analyses due to the severity of short stature in the majority of patients and the prompt GHD diagnosis.

A tendency for better adult height adjusted for target height in patients homozygous for the A allele was also observed, but this difference did not reach statistical significance. One previous study, especially designed to evaluate the association between *IGFBP3* polymorphisms and body size, found a weak association between the  $-202$  A *IGFBP3* allele and higher adult height in a cohort of Hispanic, but not in non-Hispanic, women (29). A possible explanation for the lack of a clear association between this polymorphism and the height of healthy adults might be the fact that, in individuals with normal GH secretion, slight differences in GH sensitivity could be counterbalanced by a corresponding increase in GH secretion. Conversely, in patients with severe GHD, who depend on fixed doses of rhGH administered, the adaptive response is impaired, and differences in GH sensitivity will probably be more clearly observed. It is noteworthy that all our patients had severe GHD due to the stringent diagnostic criteria used in our unit. Hence, they comprise a homogeneous severe GHD cohort, ideal to evaluate the effect of genetic factors on growth responsiveness to rhGH.

There is much evidence for stimulatory effects of *IGFBP-3* on *IGF-I* action. First, *IGFBP-3* prolongs the half-life of *IGF-I*, thus modulating its endocrine actions (11, 13). Moreover, *IGFBP-3* can potentiate *IGF-I* autocrine and paracrine actions, as demonstrated by many *in vitro* (30–37) and *in vivo* studies (38, 39). Indeed, *IGF-I* complexed to *IGFBP-3* appears to be more potent than free *IGF-I* under many conditions (36, 38–40). Some of the

proposed mechanisms for stimulatory effects of *IGFBP-3* on *IGF-I* actions are: 1) *IGFBP* interaction with cell or matrix components, which may concentrate *IGFs* near their receptor, enhancing *IGF* activity and facilitating the storage of *IGFs* in extracellular matrices for future action (11, 14); 2) accumulation of cell-bound forms of *IGFBP-3* with lowered affinity for *IGF*, which may enhance the presentation of *IGF* to Type 1 *IGF*-receptor and facilitate a slow exchange of *IGF-I* between the receptor and *IGFBP-3* (35, 41); 3) cell protection from *IGF-I*-mediated down-regulation of *IGF-I* receptor (33, 42); 4) potentiation of *IGF* action mediated through the phosphatidylinositol 3-kinase pathway (32).

In summary, we suggest that the higher levels of *IGFBP-3*, related to the presence of the  $-202$  AA *IGFBP3* genotype, may result in prolonged half-life of the *IGF-I/IGFBP-3* complex and/or amplification of *IGF-I* local effects, thus enhancing rhGH actions. For the first time, a direct relation between the  $-202$  A/C *IGFBP3* promoter region polymorphism and responsiveness to rhGH treatment in GHD children was demonstrated. Patients homozygous for the A allele presented better growth velocities and higher *IGFBP-3* levels in the first year of rhGH treatment than patients who harbor one or two copies of the C allele. These results substantiate the importance of pharmacogenetic studies on rhGH treatment and suggest that future studies adjusting rhGH treatment to genotype may provide additional tools to individualization of rhGH therapy and improved growth outcomes.

## Acknowledgments

Address all correspondence and requests for reprints to: Alexander A. L. Jorge, Unidade de Endocrinologia do Desenvolvimento, Laboratorio de Hormonios e Genetica Molecular LIM/42, Faculdade de

Medicina da Universidade de Sao Paulo, Av. Dr. Enéas de Carvalho Aguiar, no. 155, PAMB, 2 degree andar, bloco 6, São Paulo, Brazil. E-mail: alexj@usp.br.

This work was supported by grants from Fundacao de Amparo a Pesquisa do Estado de Sao Paulo (05/04726-0 and 06/55763-5, to E.F.C.) and from Conselho Nacional de Desenvolvimento Cientifico e Tecnológico–CNPq (307951/06-5 to A.A.L.J., 301246/95-5 to B.B.M., and 300938/06-3 to I.J.P.A.).

Disclosure Statement: The authors declare that they have no competing financial interests.

## References

1. GH Research Society 2000 Consensus guidelines for the diagnosis and treatment of growth hormone (GH) deficiency in childhood and adolescence: summary statement of the GH Research Society. *J Clin Endocrinol Metab* 85: 3990–3993
2. Ranke MB, Lindberg A, Chatelain P, Wilton P, Cutfield W, Albertsson-Wikland K, Price DA 1999 Derivation and validation of a mathematical model for predicting the response to exogenous recombinant human growth hormone (GH) in prepubertal children with idiopathic GH deficiency. KIGS International Board. Kabi Pharmacia International Growth Study. *J Clin Endocrinol Metab* 84:1174–1183
3. Carel JC, Ecosse E, Nicolino M, Tauber M, Leger J, Cabrol S, Bastie-Sigeac I, Chaussain JL, Coste J 2002 Adult height after long term treatment with recombinant growth hormone for idiopathic isolated growth hormone deficiency: observational follow up study of the French population based registry. *BMJ* 325:70
4. de Ridder MA, Stijnen T, Hokken-Koelega AC 2007 Prediction of adult height in growth-hormone-treated children with growth hormone deficiency. *J Clin Endocrinol Metab* 92:925–931
5. Reiter EO, Price DA, Wilton P, Albertsson-Wikland K, Ranke MB 2006 Effect of growth hormone (GH) treatment on the near-final height of 1258 patients with idiopathic GH deficiency: analysis of a large international database. *J Clin Endocrinol Metab* 91:2047–2054
6. Blethen SL, Baptista J, Kuntze J, Foley T, LaFranchi S, Johanson A 1997 Adult height in growth hormone (GH)-deficient children treated with biosynthetic GH. The Genentech Growth Study Group. *J Clin Endocrinol Metab* 82:418–420
7. Dos Santos C, Essioux L, Teinturier C, Tauber M, Goffin V, Bougneres P 2004 A common polymorphism of the growth hormone receptor is associated with increased responsiveness to growth hormone. *Nat Genet* 36:720–724
8. Jorge AA, Marchisotti FG, Montenegro LR, Carvalho LR, Mendonca BB, Arnhold JJ 2006 Growth hormone (GH) pharmacogenetics: influence of GH receptor exon 3 retention or deletion on first-year growth response and final height in patients with severe GH deficiency. *J Clin Endocrinol Metab* 91: 1076–1080
9. Blum WF, Machinis K, Shavrikova EP, Keller A, Stobbe H, Pfaeffle RW, Amsalem S 2006 The growth response to growth hormone (GH) treatment in children with isolated GH deficiency is independent of the presence of the exon 3-minus isoform of the GH receptor. *J Clin Endocrinol Metab* 91: 4171–4174
10. Baxter RC 2000 Insulin-like growth factor (IGF)-binding proteins: interactions with IGFs and intrinsic bioactivities. *Am J Physiol Endocrinol Metab* 278:E967–E976
11. Mohan S, Baylink DJ 2002 IGF-binding proteins are multifunctional and act via IGF-dependent and -independent mechanisms. *J Endocrinol* 175:19–31
12. Rosenzweig SA 2004 What's new in the IGF-binding proteins? *Growth Horm IGF Res* 14:329–336
13. Zapf J 1995 Physiological role of the insulin-like growth factor binding proteins. *Eur J Endocrinol* 132:645–654
14. Firth SM, Baxter RC 2002 Cellular actions of the insulin-like growth factor binding proteins. *Endocr Rev* 23:824–854
15. Harrela M, Koistinen H, Kaprio J, Lehtovirta M, Tuomilehto J, Eriksson J, Toivanen L, Koskenvuo M, Leinonen P, Koistinen R, Seppala M 1996 Genetic and environmental components of interindividual variation in circulating levels of IGF-I, IGF-II, IGFBP-1, and IGFBP-3. *J Clin Invest* 98: 2612–2615
16. Deal C, Ma J, Wilkin F, Paquette J, Rozen F, Ge B, Hudson T, Stampfer M, Pollak M 2001 Novel promoter polymorphism in insulin-like growth factor-binding protein-3: correlation with serum levels and interaction with known regulators. *J Clin Endocrinol Metab* 86:1274–1280
17. Al-Zahrani A, Sandhu MS, Luben RN, Thompson D, Baynes C, Pooley KA, Luccarini C, Munday H, Perkins B, Smith P, Pharoah PD, Wareham NJ, Easton DF, Ponder BA, Dunning AM 2006 IGF1 and IGFBP3 tagging polymorphisms are associated with circulating levels of IGF1, IGFBP3 and risk of breast cancer. *Hum Mol Genet* 15:1–10
18. Cheng I, DeLellis Henderson K, Haiman CA, Kolonel LN, Henderson BE, Freedman ML, Le Marchand L 2007 Genetic determinants of circulating insulin-like growth factor (IGF)-I, IGF binding protein (BP)-1, and IGFBP-3 levels in a multiethnic population. *J Clin Endocrinol Metab* 92:3660–3666
19. Jernstrom H, Deal C, Wilkin F, Chu W, Tao Y, Majeed N, Hudson T, Narod SA, Pollak M 2001 Genetic and nongenetic factors associated with variation of plasma levels of insulin-like growth factor-I and insulin-like growth factor-binding protein-3 in healthy premenopausal women. *Cancer Epidemiol Biomarkers Prev* 10:377–384
20. Morimoto LM, Newcomb PA, White E, Bigler J, Potter JD 2005 Variation in plasma insulin-like growth factor-1 and insulin-like growth factor binding protein-3: genetic factors. *Cancer Epidemiol Biomarkers Prev* 14:1394–1401
21. Ren Z, Cai Q, Shu XO, Cai H, Li C, Yu H, Gao YT, Zheng W 2004 Genetic polymorphisms in the IGFBP3 gene: association with breast cancer risk and blood IGFBP-3 protein levels among Chinese women. *Cancer Epidemiol Biomarkers Prev* 13:1290–1295
22. Schernhammer ES, Hankinson SE, Hunter DJ, Blouin MJ, Pollak MN 2003 Polymorphic variation at the –202 locus in IGFBP3: influence on serum levels of insulin-like growth factors, interaction with plasma retinol and vitamin D and breast cancer risk. *Int J Cancer* 107:60–64
23. Slattery ML, Baumgartner KB, Byers T, Giuliano A, Sweeney C, Herrick J, Curtin K, Murtaugh M, Wolff R 2005 Genetic, anthropometric, and lifestyle factors associated with IGF-1 and IGFBP-3 levels in Hispanic and non-Hispanic white women. *Cancer Causes Control* 16:1147–1157
24. Tanner JM, Whitehouse RH, Takaishi M 1966 Standards from birth to maturity for height, weight, height velocity, and weight velocity: British children, 1965. I. *Arch Dis Child* 41:454–471
25. Tanner JM, Whitehouse RH, Takaishi M 1966 Standards from birth to maturity for height, weight, height velocity, and weight velocity: British children, 1965. II. *Arch Dis Child* 41:613–635
26. Greulich WW, Pyle SI 1959 Radiographic atlas of skeletal development of the hand and wrist. Palo Alto, CA: Stanford University Press
27. Milani D, Carmichael JD, Welkowitz J, Ferris S, Reitz RE, Danoff A, Kleinberg DL 2004 Variability and reliability of single serum IGF-1 measurements: impact on determining predictability of risk ratios in disease development. *J Clin Endocrinol Metab* 89:2271–2274
28. Clemmons DR 2001 Commercial assays available for insulin-like growth factor I and their use in diagnosing growth hormone deficiency. *Horm Res* 55(Suppl 2):73–79
29. Sweeney C, Murtaugh MA, Baumgartner KB, Byers T, Giuliano AR, Herrick JS, Wolff R, Caan BJ, Slattery ML 2005 Insulin-like growth factor pathway polymorphisms associated with body size in Hispanic and non-Hispanic white women. *Cancer Epidemiol Biomarkers Prev* 14:1802–1809
30. Ernst M, Rodan GA 1990 Increased activity of insulin-like growth factor (IGF) in osteoblastic cells in the presence of growth hormone (GH): positive correlation with the presence of the GH-induced IGF-binding protein BP-3. *Endocrinology* 127:807–814
31. Conover CA, Clarkson JT, Bale LK 1996 Factors regulating insulin-like growth factor-binding protein-3 binding, processing, and potentiation of insulin-like growth factor action. *Endocrinology* 137:2286–2292
32. Conover CA, Bale LK, Durham SK, Powell DR 2000 Insulin-like growth factor (IGF) binding protein-3 potentiation of IGF action is mediated through the phosphatidylinositol-3-kinase pathway and is associated with alteration in protein kinase B/AKT sensitivity. *Endocrinology* 141:3098–3103
33. Chen JC, Shao ZM, Sheikh MS, Hussain A, LeRoith D, Roberts Jr CT, Fontana JA 1994 Insulin-like growth factor-binding protein enhancement of insulin-like growth factor-I (IGF-I)-mediated DNA synthesis and IGF-I binding in a human breast carcinoma cell line. *J Cell Physiol* 158:69–78
34. Butt AJ, Martin JL, Dickson KA, McDougall F, Firth SM, Baxter RC 2004 Insulin-like growth factor binding protein-3 expression is associated with growth stimulation of T47D human breast cancer cells: the role of altered epidermal growth factor signaling. *J Clin Endocrinol Metab* 89:1950–1956
35. De Mellow JS, Baxter RC 1988 Growth hormone-dependent insulin-like growth factor (IGF) binding protein both inhibits and potentiates IGF-I-stimulated DNA synthesis in human skin fibroblasts. *Biochem Biophys Res Commun* 156:199–204
36. Blum WF, Jenne EW, Reppin F, Kietzmann K, Ranke MB, Bierich JR 1989 Insulin-like growth factor I (IGF-I)-binding protein complex is a better mitogen than free IGF-I. *Endocrinology* 125:766–772

37. Ramagnolo D, Akers RM, Byatt JC, Wong EA, Turner JD 1994 IGF-I-induced IGFBP-3 potentiates the mitogenic actions of IGF-I in mammary epithelial MD-IGF-I cells. *Mol Cell Endocrinol* 102:131–139
38. Bagi CM, DeLeon E, Brommage R, Rosen D, Sommer A 1995 Treatment of ovariectomized rats with the complex of rhIGF-I/IGFBP-3 increases cortical and cancellous bone mass and improves structure in the femoral neck. *Calcif Tissue Int* 57:40–46
39. Narusawa K, Nakamura T, Suzuki K, Matsuoka Y, Lee LJ, Tanaka H, Seino Y 1995 The effects of recombinant human insulin-like growth factor (rhIGF)-1 and rhIGF-I/IGF binding protein-3 administration on rat osteopenia induced by ovariectomy with concomitant bilateral sciatic neurectomy. *J Bone Miner Res* 10:1853–1864
40. Kupfer SR, Underwood LE, Baxter RC, Clemmons DR 1993 Enhancement of the anabolic effects of growth hormone and insulin-like growth factor I by use of both agents simultaneously. *J Clin Invest* 91:391–396
41. Conover CA 1991 Glycosylation of insulin-like growth factor binding protein-3 (IGFBP-3) is not required for potentiation of IGF-I action: evidence for processing of cell-bound IGFBP-3. *Endocrinology* 129:3259–3268
42. Conover CA, Powell DR 1991 Insulin-like growth factor (IGF)-binding protein-3 blocks IGF-I-induced receptor down-regulation and cell desensitization in cultured bovine fibroblasts. *Endocrinology* 129:710–716
